# Supplementary material for: Inserting ultrafine NiO nanoparticles into amorphous NiP sheets by in situ phase reconstruction for high-stability of the HER catalysts
Source: Royal Society of Chemistry journal article supplement (doi:10.1039/d1nr03567c), 2021-01-01
Supplement: d1nr03567c1.pdf [file d1nr03567c1.pdf]

## Supporting Information

### **Inserting ultrafine NiO nanoparticles into amorphous NiP sheets by in-situ phase reconstruction for high-stability of the HER catalysts**

*Chaoyang Sun<sup>1</sup>, Hui Wang,<sup>1,2</sup> Jianwei Ren<sup>3\*</sup>, Xuyun Wang,<sup>1</sup> Rongfang Wang<sup>1\*</sup>*

<sup>1</sup>State Key Laboratory Base for Eco-Chemical Engineering, College of Chemical Engineering, Qingdao University of Science and Technology, Qingdao, 266042, China

<sup>2</sup>Guangdong Provincial Key Laboratory of Electronic Functional Materials and Devices, Huizhou University, Huizhou 516001, Guangdong, China

<sup>3</sup>Department of Mechanical Engineering Science, University of Johannesburg, Cnr Kingsway and University Roads, Auckland Park, 2092, Johannesburg, South Africa.

## **Physical characterizations**

The X-ray diffraction (XRD) was done on Shimadzu XD-3A Instrument, which was fitted with filtered Cu-K $\alpha$  radiation ( $\lambda = 0.15418$  nm) and operated at 30 mA and 40 kV. The  $2\theta$  scan rate for XRD analysis was set at  $5^\circ \text{ min}^{-1}$ . JEOL (JEM-2000 FX) microscope operated at 200 kV was used for transmission electron microscopy (TEM), high angle annular dark field scanning transmission electron microscopy (STEM) images and selected area electron diffraction (SAED) analysis. X-ray photoelectron spectra (XPS) were carried out on VG Escalab210 Spectrometer with Mg 300 W X-ray source.

## **Electrochemical measurements**

A three-electrode electrochemical cell linked with a potentiostat/galvanostat (CHI 760, CH Instruments) was applied to evaluate the HER and electrocatalytic properties. In this three-electrode cell, Hg/HgO and graphite rod were used as reference electrode (RE) and counter electrode (CE) respectively. 1.0 M KOH aqueous solution was used as electrolyte for all electrocatalytic testing. Electrochemical impedance spectroscopy (EIS) spectra were measured at corresponding HER electrode potentials from 0.01 to 1,000,000 Hz with an amplitude of 5 mV. Linear sweep voltammetry (LSV) was done with a scan rate of  $5 \text{ mV s}^{-1}$ . All potentials stated in this work were normalized to the reversible hydrogen electrode (RHE).  $iR$  compensation was applied for all electrochemical experiments.

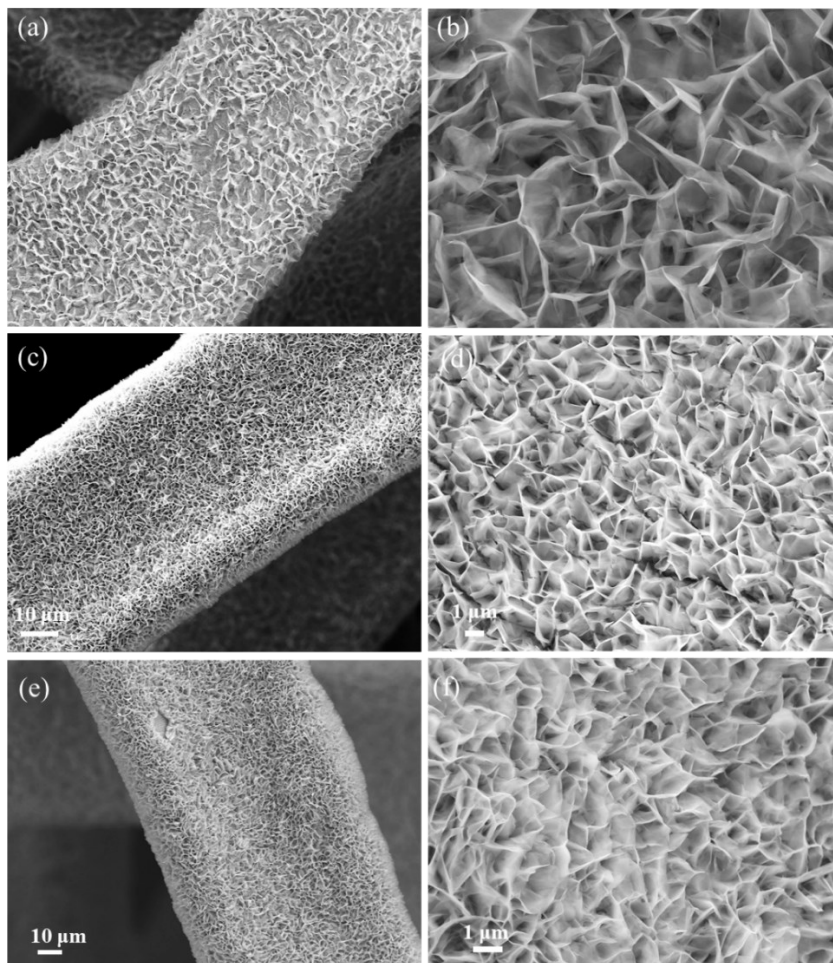

**Figure S1.** (a-b) SEM images of  $\text{Ni}(\text{OH})_2/\text{NF}$ . (c-d) SEM images of  $\text{Ni}_2\text{P}/\text{NF}$ . (e-f) SEM images of  $\text{NiO}@\text{NiP}/\text{NF}$ .

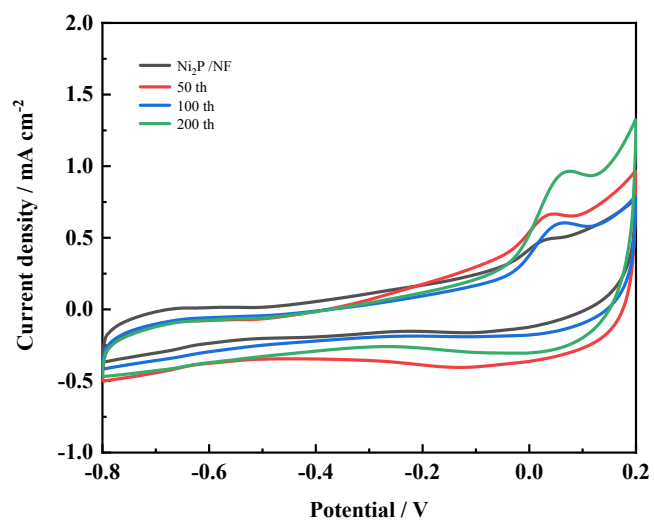

**Figure S2.** Cyclic voltammetry test of  $\text{Ni}_2\text{P}/\text{NF}$ , CV-50th, CV-100th, CV-200th.

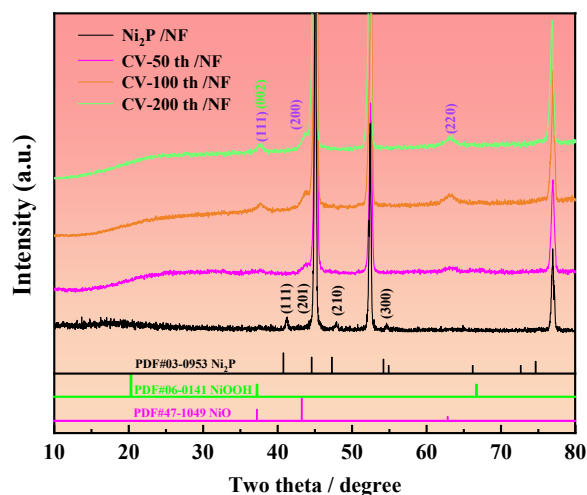

**Figure S3.** Comparison of XRD test of  $\text{Ni}_2\text{P}/\text{NF}$  after 50, 100, 200 CVs.

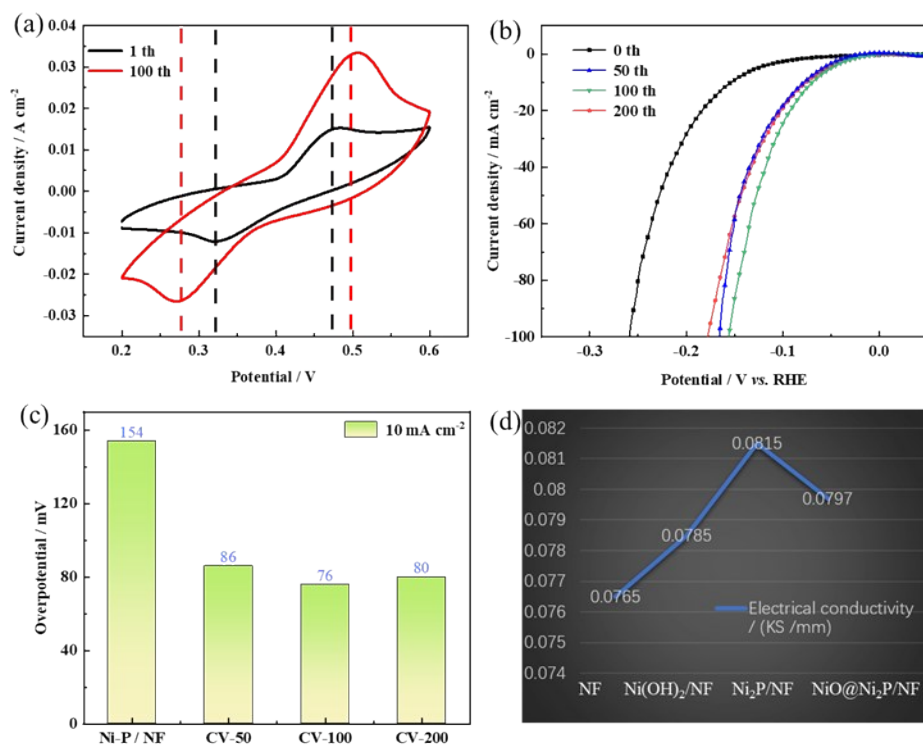

**Figure S4.** (a) Comparison of cyclic voltammetry curves before and after oxidation; (b) HER LSVs in 1.0 M KOH at a scan rate of  $5 \text{ mV s}^{-1}$  of different number of cycles; (c) corresponding overpotential at  $10 \text{ mA cm}^{-2}$  of different number of cycles; (d) Electrical conductivity of NF,  $\text{Ni}(\text{OH})_2/\text{NF}$ ,  $\text{Ni}_2\text{P}/\text{NF}$ , and  $\text{NiO}@/\text{Ni}_2\text{P}/\text{NF}$ .

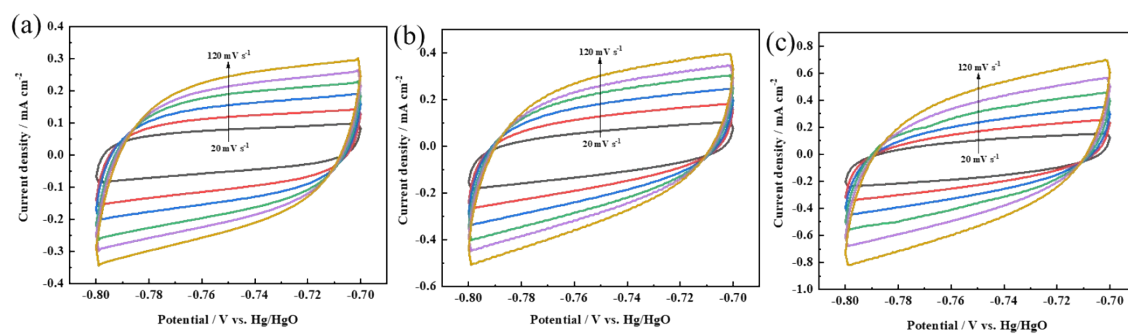

**Figure S5.** Cyclic voltammetry plots of (a) NF; (b) Ni<sub>2</sub>P/NF; (c) NiO@NiP/NF for HER.

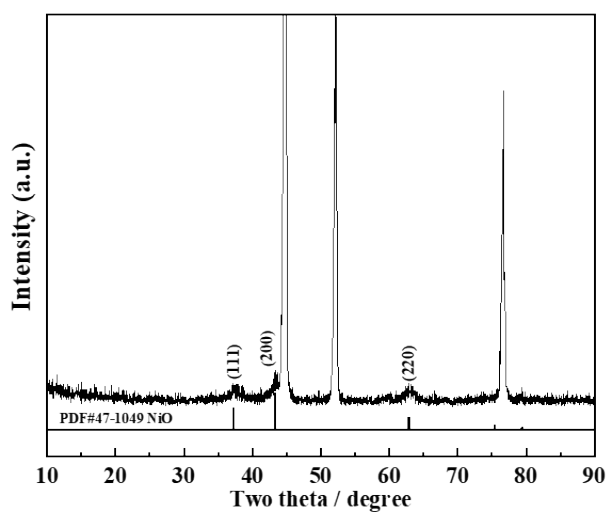

**Figure S6.** XRD pattern of NiO@NiP/NF after stability test.

**Table S1.** Element content of the samples based on XPS results.

| Sample type            | P element content(%) | Ni element content(%) |
|------------------------|----------------------|-----------------------|
| Ni <sub>2</sub> P / NF | 15.98                | 22.45                 |
| NiO@NiP/NF             | 0.9                  | 21.52                 |

**Table S2.** Comparison Table of Phosphide Sulfide Synthesized by Solid-gas Method.

| Phases of nickel phosphide                                  | Morphology         | Overpotential (mV)<br>10 mA cm <sup>-2</sup> | Stability (h) | Reference.       |
|-------------------------------------------------------------|--------------------|----------------------------------------------|---------------|------------------|
| Ni <sub>2</sub> P/Ni/NF                                     | Porous Urchin-Like | 98                                           | 20            | [1]              |
| NiCo <sub>2</sub> P <sub>x</sub> /CNTs                      | Nanosheets         | 47                                           | 48            | [2]              |
| (Fe <sub>0.1</sub> Ni <sub>0.9</sub> ) <sub>2</sub> P(O)/NF | Nanosheets         | 87                                           | 40            | [3]              |
| Ni <sub>5</sub> P <sub>4</sub>                              | Disklike           | 140                                          | 24            | [4]              |
| CoS <sub>x</sub> /Ni <sub>3</sub> S <sub>2</sub> @NF        | Nanosheets         | 139                                          | 20            | [5]              |
| S-CoP@NF                                                    | Nanoparticles      | 109                                          | 20            | [6]              |
| Ni <sub>3</sub> S <sub>2</sub> /NF                          | Films              | 131                                          | 14            | [7]              |
| NiS/NF                                                      | Microsphere        | 158                                          | 20            | [8]              |
| <b>NiO@NiP/NF</b>                                           | <b>Nanosheets</b>  | <b>76</b>                                    | <b>120</b>    | <b>This work</b> |

**Table S3.** Performance comparison table with the latest literature.

| Phases of nickel phosphide                             | Morphology      | Overpotential (mV)<br>10 mA cm <sup>-2</sup> | Stability (h) | Reference |
|--------------------------------------------------------|-----------------|----------------------------------------------|---------------|-----------|
| Fe-NiFe-LDH@NF                                         | layered double  | 239                                          | 40            | [9]       |
| NiCo LDH@NiCoP/NF                                      | Nanosheets      | 112                                          | 24            | [10]      |
| Ni@Ni-M@C                                              | Nanosheets      | 123                                          | 25            | [11]      |
| Ni <sub>3</sub> S <sub>4</sub> /Ni/Ni(OH) <sub>2</sub> | Irregular clump | 54                                           | 15            | [12]      |
| FeNi-OH                                                | Nanosheets      | 82                                           | 25            | [13]      |
| Ni-Cu-P@Ni-Cu                                          | dendrite-like   | 70                                           | 10            | [14]      |
| NiCoP-WO <sub>x</sub>                                  | nanocoral reef  | 49                                           | 60            | [15]      |
| NiFe@Ni(Cu)/NF                                         | 3D hierarchical | 36                                           | 20            | [16]      |
| NiO@NiP/NF                                             | Nanosheets      | 76                                           | 120           | This work |

## References

1. B. You, N. Jiang, M. Sheng, M. W. Bhushan and Y. Sun, *ACS Catal*, 2015, **6**, 714-721.
2. C. Huang, T. Ouyang, Y. Zou, N. Li and Z.-Q. Liu, *J. Mater. Chem. A*, 2018, **6**, 7420-7427.
3. D. W. Can Lin, Huihui Jin, Pengyan Wang, Ding Chen, Bingshuai Liu Shichun Mu, *J. Mater. Chem. A*, 2020, **8**, 4570-4578.
4. M. Ledendecker, S. Krick Calderon, C. Papp, H. P. Steinruck, M. Antonietti and M. Shalom, *Angew Chem Int Ed Engl*, 2015, **54**, 12361-12365.
5. S. Shit, S. Chhetri, W. Jang, N. C. Murmu, H. Koo, P. Samanta and T. Kuila, *ACS Appl Mater Interfaces*, 2018, **10**, 27712-27722.
6. C. Guan, W. Xiao, H. Wu, X. Liu, W. Zang, H. Zhang, J. Ding, Y. P. Feng, S. J. Pennycook and J. Wang, *Nano Energy*, 2018, **48**, 73-80.
7. G. Ren, Q. Hao, J. Mao, L. Liang, H. Liu, C. Liu and J. Zhang, *Nanoscale*, 2018, **10**, 17347-17353.
8. W. Zhu, X. Yue, W. Zhang, S. Yu, Y. Zhang, J. Wang and J. Wang, *Chem Commun (Camb)*, 2016, **52**, 1486-1489.
9. Y. Wang, X. Zhang, L. Huang, Y. Guo, X. Yuan, H. Hou, J. Wu, C. Lu and Y. Zhang, *J. Colloid Interface Sci.*, 2021, **599**, 168-177.
10. L. Zhang, J. Peng, Y. Yuan, W. Zhang and K. Peng, *Appl. Surf. Sci.*, 2021, **557**.
11. K. Srinivas, Y. Chen, X. Wang, B. Wang, M. Karpuraranjith, W. Wang, Z. Su, W. Zhang and D. Yang, *ACS Sustain. Chem. Eng*, 2021, **9**, 1920-1931.
12. Z. Yao, J. Wang, Y. Wang, T. Xie, C. Li and Z. Jiang, *Electrochimica Acta*, 2021, **382**.
13. Y. Qiu, X. Zhang, H. Han, Z. Liu, J. Liu and X. Ji, *J. Power Sources*, 2021, **499**.
14. G. Barati Darband, N. Lotfi, A. Aliabadi, S. Hyun and S. Shanmugam, *Electrochimica Acta*, 2021, **382**.
15. D. Kim, Y. Jeong, H. Roh, C. Lim and K. Yong, *J. Mater. Chem. A*, 2021, **9**, 10909-10920.
16. Y. Li, K. Dastafkan, Q. Sun, Y. Ma, X. Wang, X. Yang, Z. Wang and C. Zhao, *Electrochimica Acta*, 2021, **379**.
